# Supplementary material for: Effects of Ventromedial Hypothalamic Nucleus (VMN) Aromatase Gene Knockdown on VMN Glycogen Metabolism and Glucoregulatory Neurotransmission
Source: MDPI journal article supplement (doi:10.3390/biology12020242), 2023-02-03
Supplement: s1 [file s1]

Supplementary Figure S1    Representative Rostral VMN Target Protein Full-Length Western Blots

1A. Aromatase

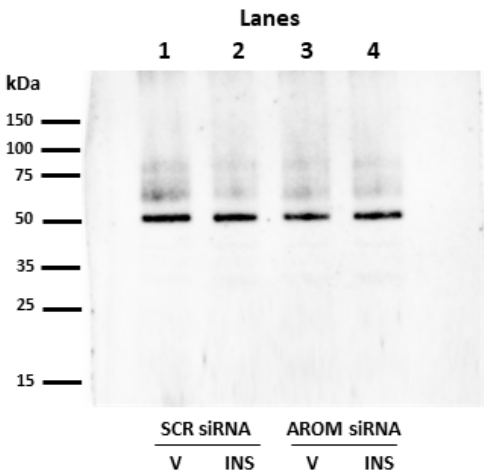

1B. Neuronal Nitric Oxide Synthase

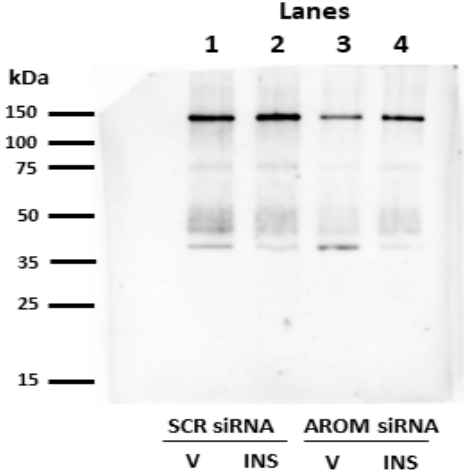

1C. Glutamate Decarboxylase<sub>65/67</sub>

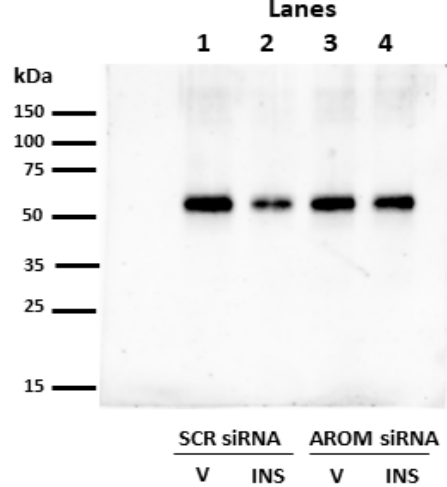

1D. Glycogen Phosphorylase-Brain Type

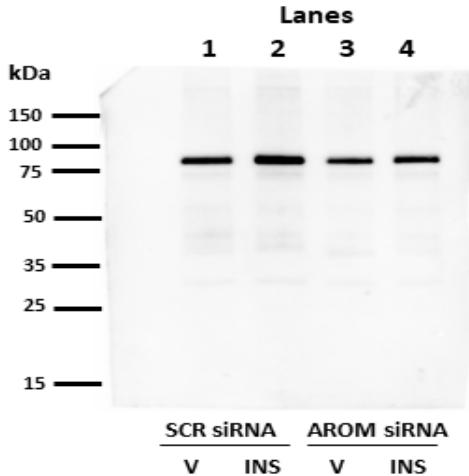

1E. Glycogen Phosphorylase-Muscle Type

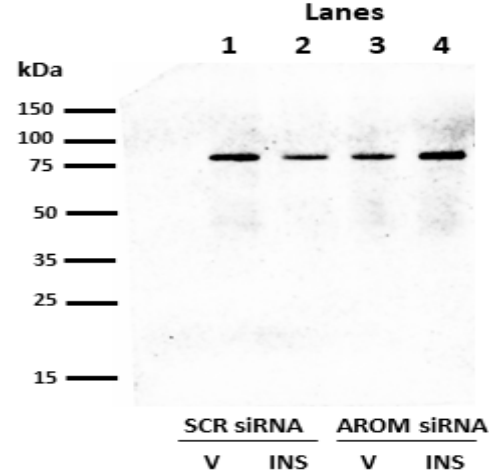

1F. Glycogen Synthase

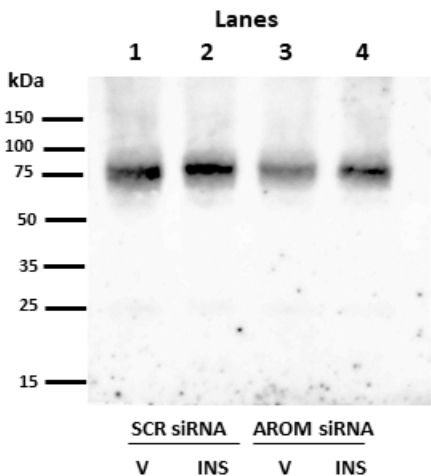

**Figure S1 Legend:** Figures 1A-1F depict full-length, uncropped immunoblots for rostral (-1.8 to -2.3 mm posterior to bregma) ventromedial hypothalamic nucleus (VMN) micropunch-dissected tissue sample aromatase (AROM; 1A), neuronal nitric oxide synthase (1B), glutamate decarboxylase<sub>65/67</sub> (1C), glycogen phosphorylase-brain type (1D), glycogen phosphorylase-muscle type (1E), or glycogen synthase (1F) protein levels in groups of male rats pretreated by intra-VMN administration of scramble (SCR) or AROM siRNA prior to subcutaneous injection of vehicle (V) or insulin (I). Molecular weight markers (15-150 kDa) are depicted to the right of each blot.

Supplementary Figure S2    Representative Middle VMN Target Protein Full-Length Western Blots

2A. Aromatase

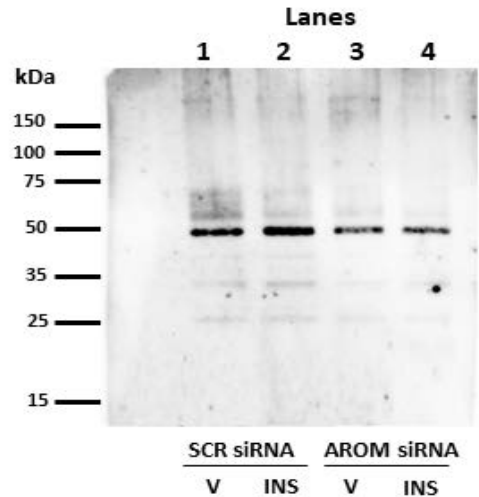

2B. Neuronal Nitric Oxide Synthase

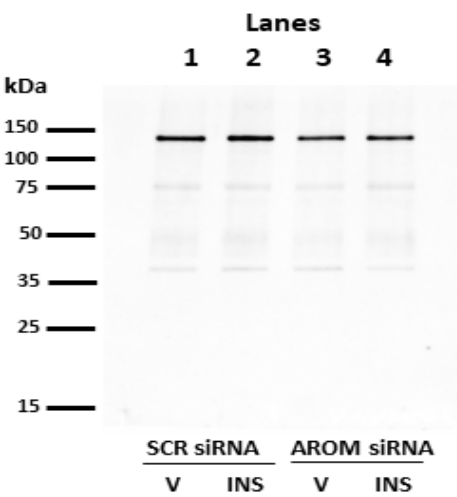

2C. Glutamate Decarboxylase<sub>65/67</sub>

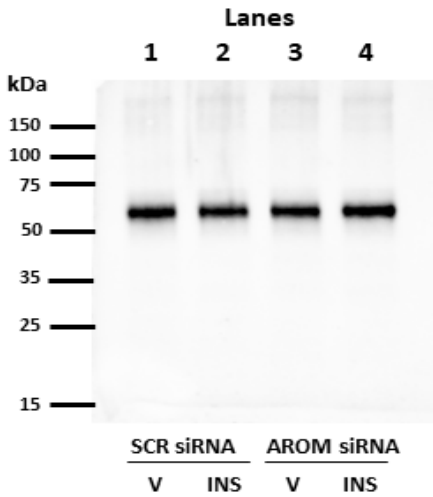

2D. Glycogen Phosphorylase-Brain Type

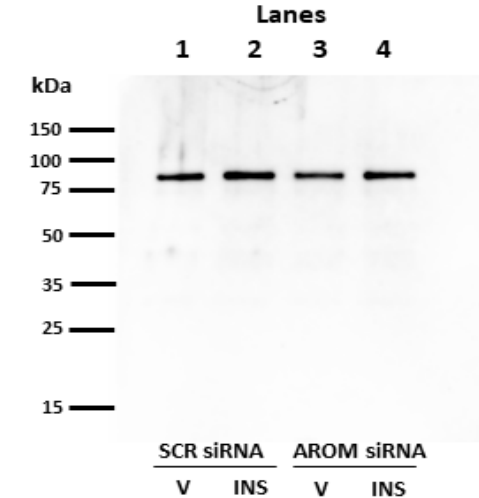

2E. Glycogen Phosphorylase-Muscle Type

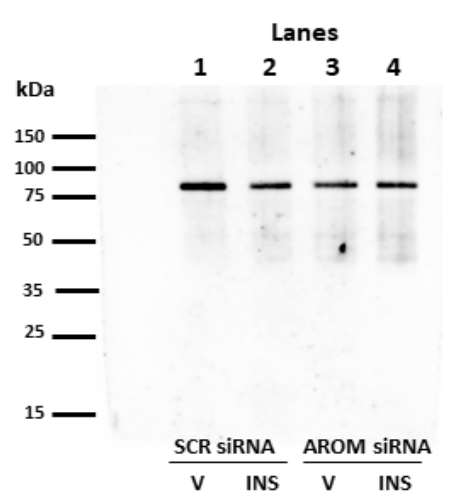

2F. Glycogen Synthase

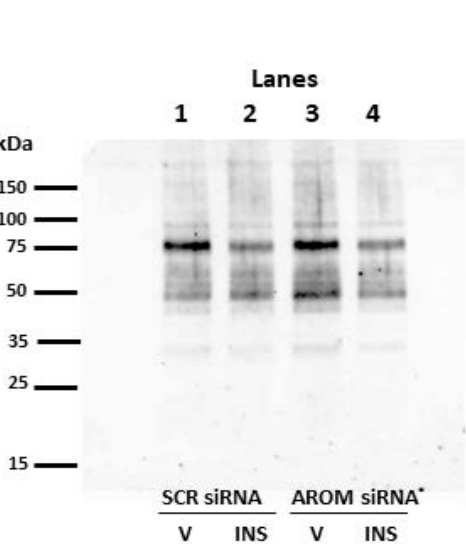

**Figure S2 Legend:** Figures 2A-1F depict full-length, uncropped immunoblots for middle VMN (-2.3 to -2.8 mm posterior to bregma) micropunch-dissected tissue sample AROM (2A), neuronal nitric oxide synthase (2B), glutamate decarboxylase<sub>65/67</sub> (2C), glycogen phosphorylase-brain type (2D), glycogen phosphorylase-muscle type (2E), or glycogen synthase (2F) protein levels in groups of male rats pretreated by intra-VMN administration of 0 SCR or AROM siRNA prior to subcutaneous injection of V or 0 I. Molecular weight markers (15-150 kDa) are depicted to the right of each blot.

Supplementary Figure S3    Representative Caudal VMN Target Protein Full-Length Western Blots

3A. Aromatase

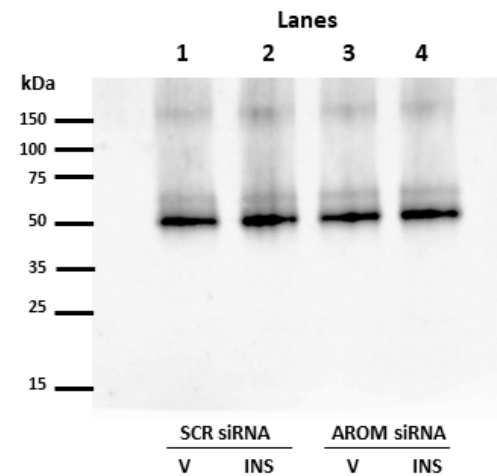

3B. Neuronal Nitric Oxide Synthase

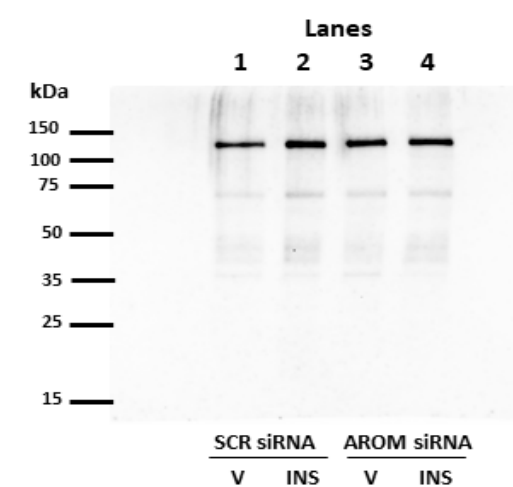

3C. Glutamate Decarboxylase<sub>65/67</sub>

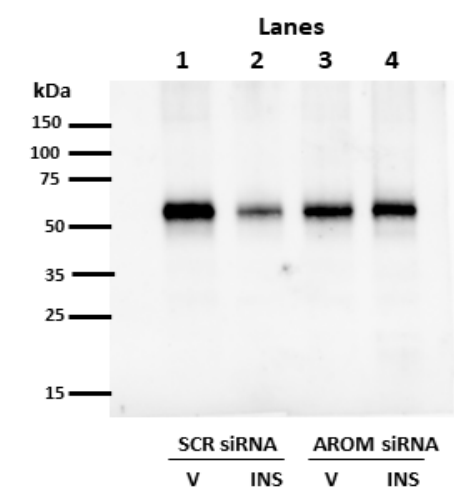

3D. Glycogen Phosphorylase-Brain Type

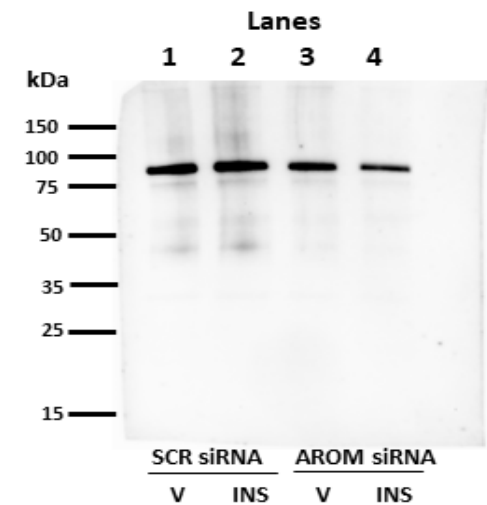

3E. Glycogen Phosphorylase-Muscle Type

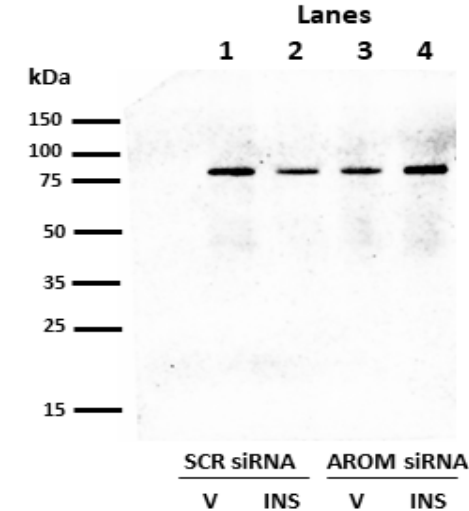

3F. Glycogen Synthase

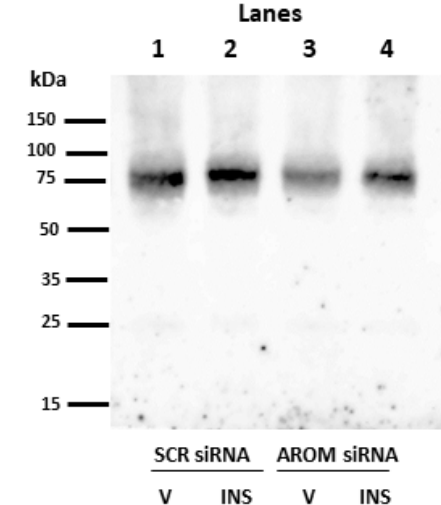

**Figure S3 Legend:** Figures 3A-1F depict full-length, uncropped immunoblots for caudal VMN (-2.3 to -2.8 mm posterior to bregma) micropunch-dissected tissue sample AROM (3A), neuronal nitric oxide synthase (3B), glutamate decarboxylase<sub>65/67</sub> (3C), glycogen phosphorylase-brain type (3D), glycogen phosphorylase-muscle type (3E), or glycogen synthase (3F) protein levels in groups of male rats pretreated by intra-VMN administration of SCR or AROM siRNA prior to subcutaneous injection of V or I. Molecular weight markers (15-150 kDa) are depicted to the right of each blot.

**Supplementary Figure S4** Effects of Intra-VMN siRNA Administration on Aromatase Protein Expression in other Hypothalamic Metabolic Regulatory Structures

**4A. PVN Aromatase**

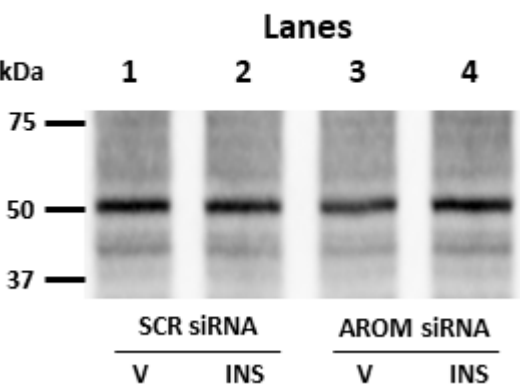

**4B. DMN Aromatase**

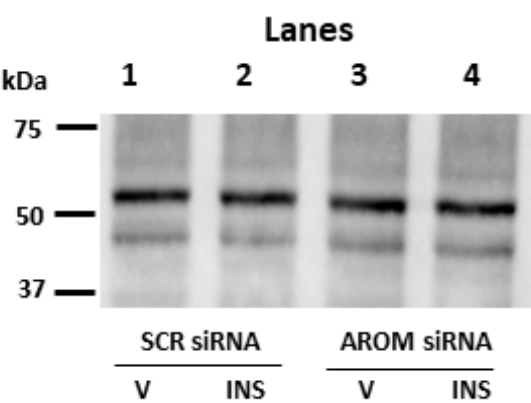

**4C. LHA Aromatase**

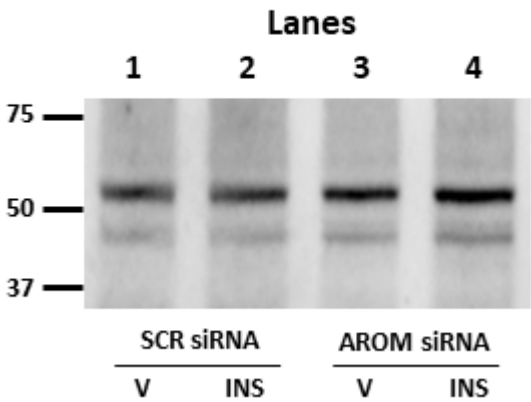

**4D. ARH Aromatase**

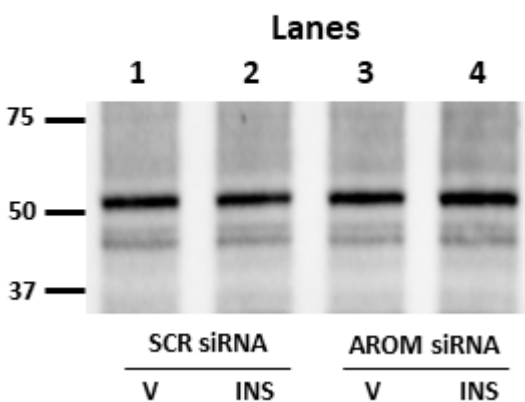

**Figure S4 Legend:** Figures 4A-4D show that aromatase protein expression in the PVN, DMN, LHA, and ARH, respectively, is unaffected in each location by siRNA-mediated VMN aromatase gene knockdown.
